# Supplementary material for: RIC8 Is a Guanine-Nucleotide Exchange Factor for Gα Subunits That Regulates Growth and Development in Neurospora crassa
Source: Oxford University Press journal article supplement (doi:10.1534/genetics.111.129270), 2011-07-13
Supplement: 129270_si.pdf [file 129270_si.pdf]

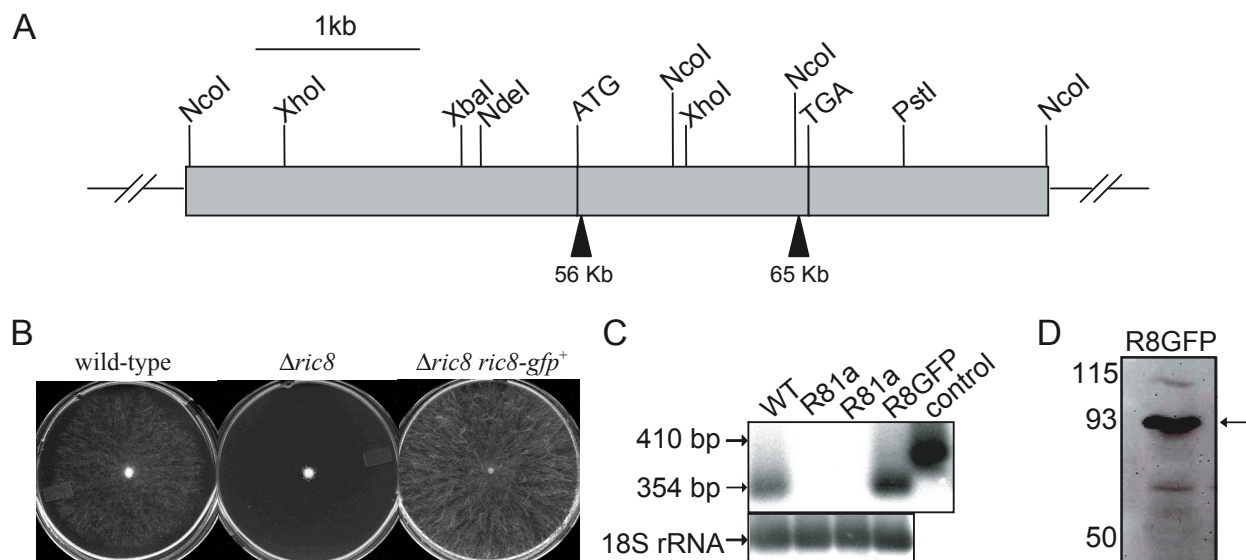

**Figure S1** *ric8* gene structure, mutant verification, and expression RIC8-GFP. A) The *ric8* genomic region from *Neurospora crassa*. Intron locations (black triangles) and restriction enzyme sites (black lines) are shown. B) Complementation of  $\Delta ric8$  by expression of a *ric8-gfp* allele. A VM plate culture is shown for wild-type (2489),  $\Delta ric8$  (R81a), and  $\Delta ric8, ric8^+::gfp^+::his-3^+$  (R8GFP). C) RT-PCR analysis of *ric8* mRNA levels. Samples containing 2  $\mu$ g of total RNA isolated from conidia of strains used in (B), with a duplicate R81a reaction, were subjected to RT-PCR with primers designed to flank the first predicted intron of *ric8* (R811fw and R811rv, TABLE S1). The predicted intron size is 56 bp, making the size of the RT-PCR fragment about 354 bp. For the control and probe DNA, a 410 bp fragment of genomic DNA was amplified by PCR from plasmid pSM2 using the same primers. Expression of the 18S rRNA gene was assessed under identical RT-PCR conditions (See methods). D) Western analysis. Protein from a whole cell extract isolated from a 16 hr submerged culture of strain R8GFP was subjected to Western analysis using anti-GFP antiserum (See methods). The approximately 93 kDa protein is indicated by the black arrow.

```

Nc -----MASTGVSQPAKLVAVTTLHKLTEDLKSTSLSP-----ERDKALELKVYGRDPRNADPI-----FTKCGIETLTKHAFDS
Pa -----MNAKAKIPVAKLDVAKVQLLGSLEDELETSSLAPQRWFIFPAALBIASNKFEIGRESLLELKIYGRDPNACDPI-----FTKEGITLVRHAFDS
Mg -----MLNNTLTKGTDKLLDLKHHNLSQ-----ERDAALEQLKVYGRDPRDAPPI-----FTKEGISTLAHSEDFG
Fg -----MALPAPAGLPTGTDKLEYIKELINDLEDLNELELDP-----DRAAVLDQKHLTRDPIINADPL-----YTBEGISTLLRHAYDK
Ss MSISSTRTSLSQCLTGEAKLADVTNIVBSLKADELNISLLPH-----ORDALLEQLKVYGRDPRADPI-----FTREGIETLSKHAFNS
An -----MDLRILQSGEKLQOVTKLLNSLEKDLKNSLNSA-----ORTQILQLRQYGTSPDNAGPI-----YSRKGIEITLSKVCIDG
Hc -----MATPALVVEVTSCLNAEKTAAQFGSRGS-----WEQNINLEINFLGLOFQONNSR-----IRGEGKTRG
Bc MSISARTSLSQELTGAKLTDVTKIVBSLKEDELEKISLLEPH-----ORDALLEQLKVYGRDPRNADPI-----FTKEGIEITLSKHAFNS
Sj -----MPDSKSTVDLLSFERDNGSFVPTICSKINLLKPTAWELSAN-----LIEIAVSLKELRKKSRPKDACQKISNALDWTLVLAERAFVSKLRNSA
Yl -----MIGHLHLYDITYTISLLEHNPVQYHFSPPKMSKKTAYEDFQS-----EPQDPLICLALKMGLTTACAWTCIG-----GISAADDIATHVLDG

* * *
Nc PSETTSRNALRVLGNAMLLIPETQRQRFVDLGYEAKACEKLN--DNWDEFLAARVIFSTYGTIVDLAKLIDBHHLAESVANLARHARSRISEHAKNKIKPDPME
Pa TSVNTRSRGALRILCNLILLPEPQRQRFVDLGYAAKASEKLE--DNSDDEFLVARLLISTYNTNIDLPKLIHQHGLADSIANHLARHAKRISSTNR-STTANPMD
Mg SDDTTSRNALRCLANAMLLPSSRQELVDLGYHIKAKALAS--DSWDEFLVSRVLMLANARNINHEILITQHGLAELIARLESMMRFLP----DEDSSPNTME
Fg PSTKSAADARRVLANAMVLTVDRIFNKGCAPNAOQGLNG--GSFDDEFLNSRILFLSTYGTIKVDLKKLIDDEKLADRISENLARHAK----ESKAKSDPMQ
Ss PSKFTSRNALRCLANALLKPDTRQTLVTLGYDAKACTLLKDRNGSVVDEFLSRIIFLITYGTTININLIDHCHLADATSHNLANHARLHNAKQKVKQLDPM
An ETTDVRHAALRCVANALLDSNMROLFVDTCGKGRLEAMLKC--DSSHEMVISRILFLSTYDININFDLNNHSLGDNINYOILRHSKQPKSGR--PLSQVD
Hc -----CHAIKIKITCOQYKNSSSFSKSVNTECDLE--BNSDDEFLASRLFLFLATYDIDLEFKLIDNNNLGEYINNHYRHSKRFKARKK--KLDQMD
Bc PSKFTSRNALRCLANALLKPDTRQTLVGSYDERACALLKDRIASVDEFLSRIIFLITYGTTININLIDQCHLADITSHNLANHDKLHSAKQKKTROLDPME
Sj HSLELIRLIVNVLVNPMSQRIASLFSNSAFDEESFQNSACQIALRLFLLCVGENDEDRWTFRITPEGLQALGIVVNNLSTEPVSASVLDLRLRAY
Yl SLEASTLNLAATVSNQYFLLRQYITTSATKAPKLVNWAATTPDTERGKMCRRILELCSSEIRIEGLNVATLAKGLEBLGLTDLQDLQLEKQKQKQLLLOHREIL

* * *
Nc LMAIGETLRLLFNVTSKCPKSLDCFTAAVPHIVTLLSLDIPPKKTPPLESPLSPLVNALMNLKLDSEARSCLYPKDAPSSLAELKITLLELSIKAYS-DOELD
Pa PMALBETLKLITFNVSCHSPNHLASHEPAAPHIITILCSIDLPSHTKTPGPFPGPAVNALNLDLSPTAKYLYLDPSSPSSFDRLIKLISLSTIKAYK-NPDLE
Mg GMALSETLKMFPVAVLRFQGOSTRBACAGHILTLICQRPLE--AESVLDPPFGPLINALCTLDLEDEAITNIFPERDPSIVTSRLISILDRALSEKNGMDD
Fg DMALVESAKLLFNVTYCPDKSSFSATAPHLVALLLKQDIS--QTKPLDPPVGFIFINALNLDVGSDCQKSIHPEDEPKVVSRLISILDPAAMKNVP-DNQLD
Ss DMALAESLKLFLNITFCPCRNSSFSQALPHILSILDKREI--PNTPLESPISQLINLNLPLEDEPCNIVLFRANPHSHVYCKFLELLEHSHINEYK-DEELE
An ELAFTDITLKLFNIAKLFQDLAPITFSPSTPYIFKIIIRIDILPLKPLDGLGLTLLNCLSTLLENKKNKPYDGNPIFFPTFNQCNVDKLNILDQAVSAYE-PSELE
Hc ELALSETLKLNFNITNBYHIVDAPSPSPHIIKILSRIEITPEPLQAPVNYLINSLLNLDLEAKKSKHFCTNPLPKFDQNCNVDKLNILDQAVAMHK-POHLE
Bc DMALGS-----PNNVVEKFNILLDHSINKYK-DEELE
Sj AVGSKDKPKSSTAQLSPEFVIQLWKETGTRDPSYTSNTSWHIVNALVLPLQNLTSSSLYQITDIALTALDVLPLKGIQLLEAGNASFKVFNFAVVELTAKELE
Yl SGFVCLITVYKTVREDQEKQTSSELKQIVPHVLTIAQNP-----BLLYPCPIISCRPMAVESQKLFVYLETLEVOIKQVLCATYPTDIALA---QLL

* * *
Nc ATVIPLVCLISSIYENAPASPVRDFIRKSLLPSEERHNKVLGKGDTPAKLLANMTPNPLAPBFARAVSHLLFNVSQDKANKFVENIGYGYASGFLFQNNIPV--
Pa QIVIPLYCALSTVYEHAPAS--VKQSIKCALLPTEKDRTEALGKADTLQGHLLKNWNSPEAPELCKATAHLYFDLSNRDPHKFVKNVGYGYASGFLFQNNISFTPE
Mg PTMTVLAGSLCIIIEAEP--VRISMCAQLLPTDEDRKEVLGSTELESPLSKLLKMTNMAPKSRKAIHLLFLGLSDRDAGKFVEKVGYGYASGFLFEENIPVPOS
Fg ATVSPLLGVISSVYKHAADS--SKKYIREKLLPTEEDRKEVLGKGDALSAKLLQNFNPLAPSIVGTVITQHLLYDLSENDANKFVENVGYGFASGFLFQNNIPVPS
Ss QLVSPLLTLIRRYEYEGPSE--VHKFLQIRLLPSDKD-----HASTFVQNLGYGFASGFLFQRNIPIPEN
An TKATPLFHTLVITHEVADPG--PRKYMOWLLLEDNDRDRPTGQSDTSSKLLKLSMTHYAN-LKVAISELMFVLSCKNABSLTNIGYGFAGLLASRGMDIPKS
Hc SLAVPLLTLLRKLVSFAPEG--PKKYMFWLLLEDNDHDLPIGKSNLTLSSRLRLSSTPVAPSLREGISALMFELSAGSDAIDFVRVNVGYGFAGFLSHDMPVPE
Bc QLVSPLLTLIRKANEIGPSE--VHOFMCIQLLPSDKDREQPVGRGESLSARLQOLSTSPMAPOVRESISALLFELSDKDASTFVENLGYGFASGFLFQHNVPIPEN
Sj VRISPLLALLQNVKINDTO--TCRLLESRLPSEADRSASLAFSGSLPSRLRLVLPFCFLOPOQAHLIYSLCRENAKVLDTIGYGFASGILRVCCBETDST
Yl YGLAPLVPVTTVDGABPAR---EILCRVFLPSDEDRKEALGKTKSIPSRLLKVIIEPEFQDCFLVNEAQVLCENKDKFTDAILGAYAGYLTFGAASSAS

* * *
Nc EGLCGDAEKGESSQACQSS--RRAVNPITGQFLDTEFTFDPPEMTEEEKEREAERLFLVLFERAKLGIIVNVENPVAKAQEGRFEELPDDYEDSD-----
Pa ELNKGGETVECEDEGVREI--KRFINPITGQFLDTERVSELPEMTEDEKEREERLFLVLFERLQOTGIIDVONPVECAMREGRFEELPDDK-----
Mg ALAS-----EGASCSTMQ--GRAVNPITGQFLDAEKLSLIPMPSOEBEKEEAERLFLVLFERLKKITGVVDVONPVEKAFQEGRFEELDDDEDGDNENKVKVEQK
Fg ASDFG-----S--QKRVNPTGQHVDAKPVDEPEMTEEEKEREAERLFLVLFERLKNITGVVDVONPVEBAMREGRFEELKDDVEEIE-----
Ss ALEAWSKENDNDGKARSSHDSGKAVNPITGQFLHAEKIDMPMPSOEBEKEERAEKLFVLK---KNGIITAKNPEBALQGRFEELDDADSD-----
An ACEAFATN-----SCLNPNINPTGQFWAAEKEDTGPMTKEEKEREAERLFLVLFERAKANGILGVENPVQALREGRFEELPDSSE-----
Hc AKEAFSTS-----AGGLDPMNPTGQFWDAEPQDGGPEMTEEEKEREAERLFLVLFERLKATGVVDVNPVSAALQTCRFEELG-----
Bc AFEAWSTENDKNGKARPSQDSGKAVNPITGQFLHAEKIDMPMPSOEBEKEEREAERLFLVLFERLKNNGIITANPNPEBALQGRFEELDDADSD-----
Sj VSKDSLFSG-----LSTATADNVNPTGQFTSEKPP--VPEMSEEEKEREAERLFLVLFERLKNNGIIVENPVKKAVERSCLFENSNNDNA-----
Yl GPASNISGFG-----YDKVITGQKLTPELQELKQEQEIS--AMSPBEKEREAELMYLNLNRMRELGIIVNFHPHRAAQESGRFEELD-----

```

**Figure S2** RIC8 homologs in other fungi. ClustalW (<http://www.ch.embnet.org/software/ClustalW.html>) was used to align RIC8 sequences from *Neurospora crassa* (Nc; NCU02788.3), *Podospora anserina* (Pa; Pa\_1\_3900), *Magnaporthe grisea* (Mg; MGG\_14008), *Fusarium graminearum* (Fg; FSG\_01511), *Sclerotinia sclerotiorum* (Ss; SS1G\_02787.1), *Aspergillus nidulans* (An; AN1661.3), *Histoplasma capsulatum* (Hc; HCAG\_03335.1), *Botrytis cinerea* (Bc; BC1G\_02317.1), *Schizosaccharomyces japonicus* (Sj; SJAG\_02027), *Yarrowia lipolytica* (Yl; ACCESSION# XP\_505953). Shading indicates identical (black) and similar (grey) amino acid residues ([http://www.ch.embnet.org/software/BOX\\_form.html](http://www.ch.embnet.org/software/BOX_form.html)).

**Table S1 Oligonucleotides used in this study**

| Name        | Sequence (5'-3')                                               |
|-------------|----------------------------------------------------------------|
| R8 GFP fw   | TATCTAGAATGGCCTCAATAGGAGTTTCTGGGCCAGGTC                        |
| R8 GFP rv   | GGGGATCCAGTCCGAATCCTCTTCGTAGTCGTCGGG                           |
| R8I1fw      | CACCATGGCCTCAATAGGAGTTTCTGGG                                   |
| R8I1rv      | CAGTTGTCGTTTTGAGCTTTTCGCAGGCC                                  |
| R8YR11fw    | GTAACGCCAGGGTTTTCCAGTCACGACCGCCTGAGATGTGTTGTATCGAGAG           |
| R8YR11rv    | CAGCTTATGAATGAGAGTGGTGACAGCTTGCAACTGGCTGGCCAGAACTCCTATTGAGG    |
| R8YR12fw    | CCAAGTTGCAAGCTGTCACTCTCATTATAAGCTGACCGAGGACCTCAAGAGCAC         |
| R8YR12rv    | GCGGATAACAATTTACACAGGAAACAGCCGGCAAGACTGGAGGGTGCCTTGGGG         |
| R8YR21fw    | GTAACGCCAGGGTTTTCCAGTCACGACCGTCCGGTCCCGCATATAGTG               |
| R8YR21rv    | CAGGGTTCTCAACATTAACGATTCCAGCTTCTCGCCCTCTCAAACAAGACAAACAGTCTCTC |
| R8YR22fw    | GGCGAGGAAGCTGGGAATCGTTAATGTTGAGAACCCTGTTGCCAAGGCGGTTTCAGGAG    |
| R8YR22rv    | GCGGATAACAATTTACACAGGAAACAGCGGGAGTCGTATACCTCCGCGGAGGAAGGCC     |
| R8Y2Hfw     | AATTGAATTCATGGCCTCAATAGGAGTTTCTGGG                             |
| R8Y2Hrv     | AATTGGATCCTCAGTCCGAATCCTCTTCGTAGTC                             |
| NΔ13G1fw    | TTAACATATGGCCCGAACGAGGAGATTGAGAAC                              |
| NΔ13G1rv    | TTAAAGATCTTCAAATCAAACCGCAGAGACGCAGG                            |
| NΔ13G2fw    | TTAACATATGGCCTCCCGGTCGCGCGACGTAG                               |
| NΔ13G2rv    | TTAAGGATCCTCACAGGATAAGTTGTTTCAGGTTTCGCTGG                      |
| NΔ12G3fw    | TTAACATATGGAGCAGAAGAAGAGGAGCCAGAAGATC                          |
| NΔ12G3rv    | TTAAGGATCCTCATAGAATACCGGAGTCTTTAAGGGCG                         |
| R8 NdeI fw  | AATTCATATGGCCTCAATAGGAGTTTCTGGGC                               |
| R8 BamHI rv | AATTGGATCCTCAGTCCGAATCCTCTTCGTAGTCG                            |
