# Supplementary material for: RIC8 Is a Guanine-Nucleotide Exchange Factor for Gα Subunits That Regulates Growth and Development in Neurospora crassa
Source: Oxford University Press journal article supplement (doi:10.1534/genetics.111.129270), 2011-07-13
Supplement: figures1.pdf [file figures1.pdf]

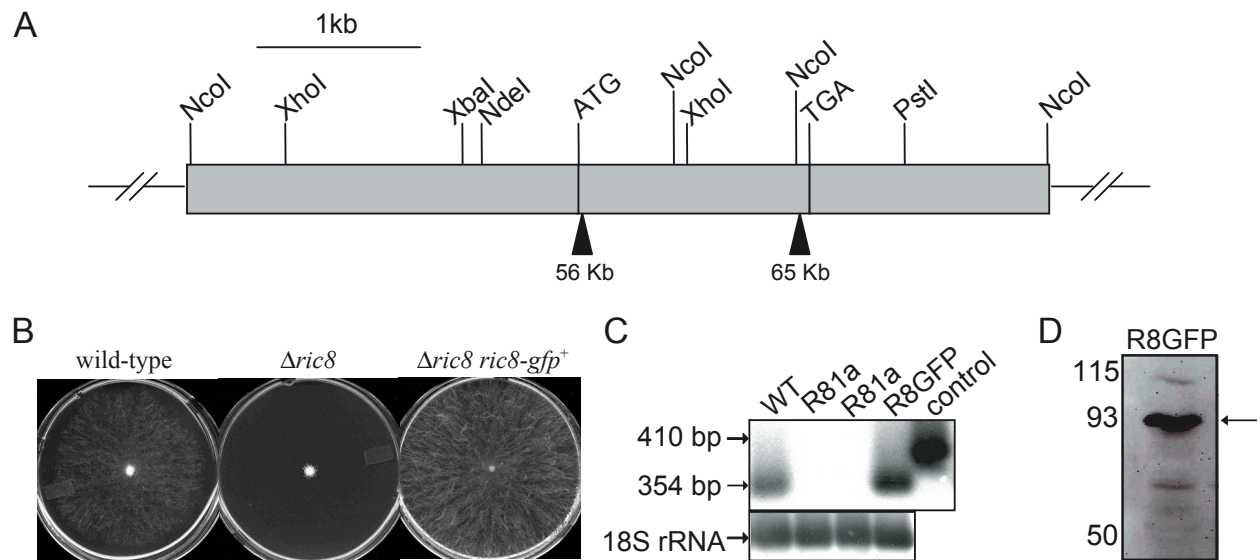

**Figure S1** *ric8* gene structure, mutant verification, and expression RIC8-GFP. A) The *ric8* genomic region from *Neurospora crassa*. Intron locations (black triangles) and restriction enzyme sites (black lines) are shown. B) Complementation of  $\Delta ric8$  by expression of a *ric8-gfp* allele. A VM plate culture is shown for wild-type (2489),  $\Delta ric8$  (R81a), and  $\Delta ric8, ric8^+-gfp^+::his-3^+$  (R8GFP). C) RT-PCR analysis of *ric8* mRNA levels. Samples containing 2  $\mu$ g of total RNA isolated from conidia of strains used in (B), with a duplicate R81a reaction, were subjected to RT-PCR with primers designed to flank the first predicted intron of *ric8* (R811fw and R811rv, TABLE S1). The predicted intron size is 56 bp, making the size of the RT-PCR fragment about 354 bp. For the control and probe DNA, a 410 bp fragment of genomic DNA was amplified by PCR from plasmid pSM2 using the same primers. Expression of the 18S rRNA gene was assessed under identical RT-PCR conditions (See methods). D) Western analysis. Protein from a whole cell extract isolated from a 16 hr submerged culture of strain R8GFP was subjected to Western analysis using anti-GFP antiserum (See methods). The approximately 93 kDa protein is indicated by the black arrow.
