# Supplementary material for: RIC8 Is a Guanine-Nucleotide Exchange Factor for Gα Subunits That Regulates Growth and Development in Neurospora crassa
Source: Oxford University Press journal article supplement (doi:10.1534/genetics.111.129270), 2011-07-13
Supplement: tables1.pdf [file tables1.pdf]

**Table S1 Oligonucleotides used in this study**

| Name        | Sequence (5'-3')                                               |
|-------------|----------------------------------------------------------------|
| R8 GFP fw   | TATCTAGAATGGCCTCAATAGGAGTTTCTGGGCCAGGTC                        |
| R8 GFP rv   | GGGGATCCAGTCCGAATCCTCTTCGTAGTCGTCGGG                           |
| R8I1fw      | CACCATGGCCTCAATAGGAGTTTCTGGG                                   |
| R8I1rv      | CAGTTGTCGTTTTGAGCTTTTCGCAGGCC                                  |
| R8YR11fw    | GTAACGCCAGGGTTTTCCAGTCACGACCGCCTGAGATGTGTTGTATCGAGAG           |
| R8YR11rv    | CAGCTTATGAATGAGAGTGGTGACAGCTTGCAACTGGCTGGCCAGAACTCCTATTGAGG    |
| R8YR12fw    | CCAAGTTGCAAGCTGTCACTCTCATTATAAGCTGACCGAGGACCTCAAGAGCAC         |
| R8YR12rv    | GCGGATAACAATTTACACAGGAAACAGCCGGCAAGACTGGAGGGTGCCTTGGGG         |
| R8YR21fw    | GTAACGCCAGGGTTTTCCAGTCACGACCGTCCGGTCCCGCATATAGTG               |
| R8YR21rv    | CAGGGTTCTCAACATTAACGATTCCAGCTTCTCGCCCTCTCAAACAAGACAAACAGTCTCTC |
| R8YR22fw    | GGCGAGGAAGCTGGGAATCGTTAATGTTGAGAACCCTGTTGCCAAGGCGGTTTCAGGAG    |
| R8YR22rv    | GCGGATAACAATTTACACAGGAAACAGCGGGAGTCGTATACCTCCGCGGAGGAAGGCC     |
| R8Y2Hfw     | AATTGAATTCATGGCCTCAATAGGAGTTTCTGGG                             |
| R8Y2Hrv     | AATTGGATCCTCAGTCCGAATCCTCTTCGTAGTC                             |
| NΔ13G1fw    | TTAACATATGGCCCGAACGAGGAGATTGAGAAC                              |
| NΔ13G1rv    | TTAAAGATCTTCAAATCAAACCGCAGAGACGCAGG                            |
| NΔ13G2fw    | TTAACATATGGCCTCCCGGTCGCGCGACGTAG                               |
| NΔ13G2rv    | TTAAGGATCCTCACAGGATAAGTTGTTTCAGGTTTCGCTGG                      |
| NΔ12G3fw    | TTAACATATGGAGCAGAAGAAGAGGAGCCAGAAGATC                          |
| NΔ12G3rv    | TTAAGGATCCTCATAGAATACCGGAGTCTTTAAGGGCG                         |
| R8 NdeI fw  | AATTCATATGGCCTCAATAGGAGTTTCTGGGC                               |
| R8 BamHI rv | AATTGGATCCTCAGTCCGAATCCTCTTCGTAGTCG                            |
